# Supplementary material for: Porphyrin conjugated with serum albumins and monoclonal antibodies boosts efficiency in targeted destruction of human bladder cancer cells
Source: Royal Society of Chemistry journal article supplement (doi:10.1039/c3ob42082e), 2014-01-01

## Supplementary information

### Porphyrin conjugated with serum albumins and monoclonal antibodies boosts efficiency in targeted destruction of human bladder cancer cells

Patrícia M. R. Pereira,<sup>a</sup> José J. Carvalho,<sup>b</sup> Sandrina Silva,<sup>a</sup> José A. S. Cavaleiro,<sup>a</sup>  
Rudolf J. Schneider,<sup>\*,b</sup> Rosa Fernandes,<sup>\*,c</sup> and João P. C Tomé<sup>\*,a,d</sup>

<sup>a</sup>*QOPNA and Department of Chemistry, University of Aveiro, 3810-193 Aveiro, Portugal*

<sup>b</sup>*BAM Federal Institute for Materials Research and Testing, D-12489 Berlin, Germany*

<sup>c</sup>*IBILI and Faculty of Medicine, University of Coimbra, 3000-548 Coimbra, Portugal*

<sup>d</sup>*Department of Organic Chemistry, Ghent University, B-9000 Gent, Belgium*

**Figure S1.** A) Chromatograms of non-conjugated HSA and **Por 1**-HSA conjugate. The chromatograms were obtained for the HSA absorption wavelengths range between 260 nm to 280 nm and for the **Por 1** maximum absorption range between 410 nm to 420 nm. B) Reconstructed masses of HSA and **Por 1**-HSA conjugate, after Bayesian Protein Reconstruction using Analyst software.

**A**

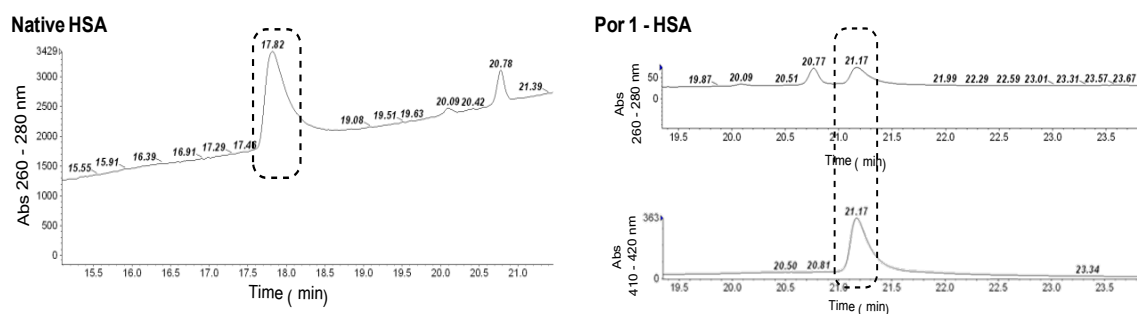

**B**

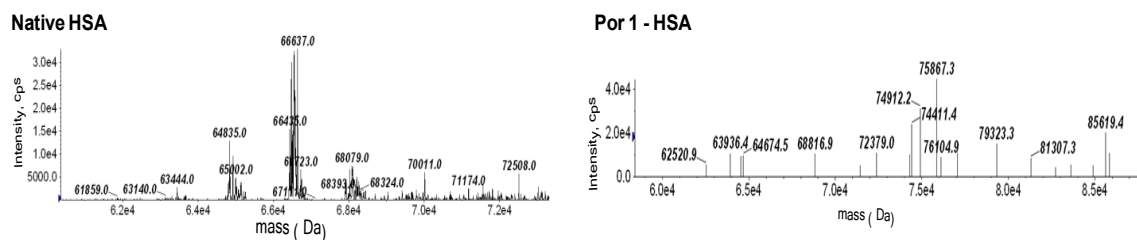

Supplement: c3ob42082e.pdf [file c3ob42082e.pdf]
